# Supplementary material for: Microbial carbon recycling: an underestimated process controlling soil carbon dynamics – Part 2: A C 3 -C 4 vegetation change field labelling experiment
Source: Copernicus journal article supplement (doi:10.5194/bg-12-6291-2015), 2015-11-05
Supplement: Supplementary file 1 [file bg-12-6291-2015-supplement.pdf]

Supplement of Biogeosciences, 12, 6291–6299, 2015  
<http://www.biogeosciences.net/12/6291/2015/>  
doi:10.5194/bg-12-6291-2015-supplement  
© Author(s) 2015. CC Attribution 3.0 License.

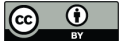

Biogeosciences  Open Access

*Supplement of*

## **Microbial carbon recycling: an underestimated process controlling soil carbon dynamics – Part 2: A C<sub>3</sub>-C<sub>4</sub> vegetation change field labelling experiment**

**A. Basler et al.**

*Correspondence to:* A. Basler (abasler@gwdg.de)

The copyright of individual parts of the supplement might differ from the CC-BY 3.0 licence.



|             |              |              |              |              |              |              |              |
|-------------|--------------|--------------|--------------|--------------|--------------|--------------|--------------|
| Wheat (n=9) | -27.46 ±0.48 | -25.90 ±3.88 | -19.91 ±0.92 | -23.54 ±0.82 | -26.57 ±0.81 | -24.02 ±1.33 | -21.45 ±3.37 |
| Maize (n=9) | -13.17 ±0.20 | -16.04 ±6.11 | -4.80 ±0.61  | -8.02 ±0.77  | -12.30 ±0.66 | -13.73 ±4.89 |              |

Table S2. Isotopic values and carbon content of microbial biomass and extractable carbon (exC). Means and standard error (n=5). A  $k_{EC}$  factor of 0.45 was used to calculate the total microbial biomass-C( Joergensen, 1996).

|                       | microbial biomass |       |                             |       | extractable C |       |                          |       |
|-----------------------|-------------------|-------|-----------------------------|-------|---------------|-------|--------------------------|-------|
|                       | 13C [‰]           |       | Cmic [mg kg <sup>-1</sup> ] |       | 13C [‰]       |       | C [mg kg <sup>-1</sup> ] |       |
| continuous wheat plot |                   |       |                             |       |               |       |                          |       |
| Ap                    | -11.21            | ±0.05 | 110.46                      | ±18.3 | -26.21        | ±0.05 | 31.63                    | ±0.05 |
| E                     | -11.27            | ±0.07 | 99.68                       | ±4.9  | -25.53        | ±0.04 | 36.34                    | ±0.41 |
| continuous maize plot |                   |       |                             |       |               |       |                          |       |
| Ap                    | -6.27             | ±0.03 | 323.95                      | ±23.6 | -21.76        | ±0.12 | 32.05                    | ±1.23 |
| E                     | -7.06             | ±0.19 | 169.26                      | ±6.5  | -17.93        | ±0.28 | 43.76                    | ±0.40 |

## Reference

Joergensen, R. G.: The fumigation-extraction method to estimate soil microbial biomass: Calibration of the  $k_{EC}$  value, Soil Biol. Biochem., 28, 25–31, doi:10.1016/0038-0717(95)00102-6, 1996.
